# Supplementary material
Source: PubMed Central journal article supplement (PMC8026669)
Supplement: NIHMS1672341-supplement-1.pdf [file NIHMS1672341-supplement-1.pdf]

## Supplementary Data and Methods

**Immunohistochemical staining:** IHC staining was performed on 5 µm sections from each TMA. Tissue sections were deparaffinized using xylene and graded alcohols. Antigen retrieval was performed in Target Retrieval Solution, pH 6.1 (Dako, Inc., Carpinteria, CA, USA) at 95°C for 30 minutes. After cooling at room temperature, slides were rinsed in Tris buffered saline (TBS), pH 7.5 (0.02 M Tris/Tris HCl and 0.15 M NaCl). Endogenous peroxidase was quenched with peroxidase blocking reagent (Dako, Inc.) for 10 minutes. After rinsing with TBS, blocking solution was applied for 30 min at room temperature and then the primary antibody solution was applied. IHC conditions for the primary antibodies were previously described (1). Slides were washed three times with TBS-T (0.1% Tween 20), then incubated with the appropriate secondary antibody (EnVision™+ Kits, Dako, Inc.). After 3× washes with TBS-T, slides were incubated with Diaminobenzidine chromogen solution. Slides were rinsed with water and counterstained with hematoxylin, dehydrated through graded alcohols, absolute ethanol, and xylene, then cover slipped with mounting medium. Positive control and negative control tissue slides were stained in parallel for all IHC staining assays.

For ER-alpha and PR, nuclear staining was scored as the staining intensity and the percentage of cells that stained positive. For the IR, the percentage of nuclear cells that stained positive (<50%, ≥50%) as well as the cytoplasmic and overall staining intensity were scored. For the IGF1R and pIGF1R/pIR, we recorded the percentage of cells with positive membranous staining (<50%, >50%) and the cytoplasmic and overall staining intensities. No nuclear staining was observed for IGF1R and pIGF1R/pIR. For ER and PR, the percentage of cells that stained positive was multiplied by the intensity value [0 (none), 1 (weak), 2 (moderate) or 3 (strong)] to calculate the histological score (H-score) with a maximum value of 300. A clinical cut-off (H-score ≥75) was used to differentiate positive and negative ER and PR staining.

**Quantitative real time reverse transcription PCR (qPCR):** We assessed gene expression levels of *IGF1*, *IGF2*, *IGFBP1* and *IGFBP3* using investigator-validated primers for the target genes (1, 2). To extract RNA, whole frozen tissues were pulverized in a tissueTUBE bag (Covaris, Woburn, MA, USA) using a Covaris CryoPrep and then homogenized in Buffer RLT (Qiagen, Valencia, CA, USA) using a Covaris adaptive focused acoustics tissue disrupter. The Qiagen AllPrep kit was used following the manufacturer's instructions for isolation of RNA and DNA. The RNA concentration and purity was measured using a Nanodrop spectrophotometer (NanoDrop Technologies, Wilmington, DE, USA), and RNA integrity was evaluated with the Agilent Bioanalyzer (Agilent, Santa Clara, CA, USA). RNA quality met the following criteria; Nanodrop, 260/280 ratio>1.8. qPCR analysis was carried out on 97% of the fresh frozen tissue samples; 11 samples (3%) were not subjected to cDNA synthesis and qPCR due to the low RNA yield/concentration. Following RNA extraction and purification, complementary DNA was synthesized from 1µg of total RNA using the SuperScript VILO cDNA Synthesis Kit (Life Technologies, Grand Island, NY, USA). qPCR reactions were carried out using primers and PowerSYBR Green (Life Technologies) detection following the manufacturer's recommendations. The reaction scale was adjusted for use in 384-well plates on the Applied Biosystems 7900HT Fast Real-Time PCR System (Life Technologies). Target gene expression was internally normalized to the expression of the housekeeping gene *peptidylprolyl isomerase B (PPIB)* and each reaction was run in triplicate on the same plate. Each assay plate included two reactions that omitted either the mRNA template or the reverse transcriptase enzyme to exclude the possibility of contamination. RNA concentrations were provided as raw Ct values and expression scores were calculated using  $2^{(-\Delta Ct)} * 1000$  [arbitrary units/scaling factor] (3).

**Serology assays:** Concentrations of the insulin, total IGF-I, IGFBP-3 serologic biomarkers were carried out in the laboratory of Dr. Herbert Yu. Insulin was measured using an immunoassay kit from Diagnostic Systems Laboratories (DSL, Webster, Texas, USA). Concentrations of total IGF-I and IGFBP-3 serologic biomarkers were determined by Quantikine ELISAs (R&D Systems, Minneapolis, MN, USA). Serum concentrations of estrone and SHBG were measured in the GCRC Analytic Core Laboratory at the Albert Einstein College of Medicine using ELISAs from ALPCO (Salem, NH, USA). Levels of serologic estradiol were measured in the

Einstein Department of Pathology laboratory using the Electrochemiluminescence immunoassay (Roche Diagnostics, Indianapolis, IN, USA).

### **References**

1. Merritt MA, Strickler HD, Einstein MH, Yang HP, Sherman ME, Wentzensen N, et al. Insulin/IGF and sex hormone axes in human endometrium and associations with endometrial cancer risk factors. *Cancer Causes Control*. 2016;27(6):737-48.
2. Brouwer-Visser J, Lee J, McCullagh K, Cossio MJ, Wang Y, Huang GS. Insulin-like growth factor 2 silencing restores taxol sensitivity in drug resistant ovarian cancer. *PLoS One*. 2014;9(6):e100165.
3. Livak KJ, Schmittgen TD. Analysis of relative gene expression data using real-time quantitative PCR and the  $2^{-\Delta\Delta C(T)}$  Method. *Methods*. 2001;25(4):402-8.

**Table S1: Adjusted hazard ratios (95% CI) for the associations between immunohistochemical staining of insulin/IGF and sex hormone axis factors in endometrial cancer in relation to progression-free survival**

|                                          | Total N <sup>a</sup> | Recurrent N | Recurrent % | HR <sup>b</sup> | 95% CI <sup>b</sup> | 95% CI <sup>b</sup> |
|------------------------------------------|----------------------|-------------|-------------|-----------------|---------------------|---------------------|
| ER (gland) negative                      | 351                  | 130         | 37.0        | 1.00 (Ref)      |                     |                     |
| ER (gland) positive                      | 171                  | 45          | 26.3        | <b>0.67</b>     | <b>0.47</b>         | <b>0.95</b>         |
| ER (stroma) negative                     | 500                  | 170         | 34.0        | 1.00 (Ref)      |                     |                     |
| ER (stroma) positive                     | 22                   | 5           | 22.7        | 0.73            | 0.30                | 1.81                |
| PR (gland) negative                      | 241                  | 96          | 39.8        | 1.00 (Ref)      |                     |                     |
| PR (gland) positive                      | 283                  | 80          | 28.3        | 0.81            | 0.59                | 1.11                |
| PR (stroma) negative                     | 483                  | 167         | 34.6        | 1.00 (Ref)      |                     |                     |
| PR (stroma) positive                     | 41                   | 9           | 22.0        | 0.79            | 0.40                | 1.56                |
| ER negative/PR negative <sup>c</sup>     | 206                  | 83          | 40.3        | 1.00 (Ref)      |                     |                     |
| ER negative/PR positive <sup>c</sup>     | 144                  | 46          | 31.9        | 0.94            | 0.64                | 1.39                |
| ER positive/PR negative <sup>c</sup>     | 34                   | 13          | 38.2        | 0.83            | 0.45                | 1.51                |
| ER positive/PR positive <sup>c</sup>     | 136                  | 32          | 23.5        | <b>0.61</b>     | <b>0.40</b>         | <b>0.94</b>         |
| IR-cyto negative                         | 23                   | 12          | 52.2        | 1.00 (Ref)      |                     |                     |
| IR-cyto weak                             | 412                  | 137         | 33.3        | <b>0.51</b>     | <b>0.28</b>         | <b>0.94</b>         |
| IR-cyto moderate/strong                  | 82                   | 25          | 30.5        | <b>0.47</b>     | <b>0.23</b>         | <b>0.93</b>         |
| IR-nucl negative                         | 84                   | 35          | 41.7        | 1.00 (Ref)      |                     |                     |
| IR-nucl <50% positive                    | 130                  | 46          | 35.4        | 0.67            | 0.43                | 1.04                |
| IR-nucl ≥50% positive                    | 303                  | 93          | 30.7        | <b>0.62</b>     | <b>0.42</b>         | <b>0.92</b>         |
| IR-overall negative                      | 24                   | 12          | 50.0        | 1.00 (Ref)      |                     |                     |
| IR-overall weak                          | 252                  | 85          | 33.7        | <b>0.53</b>     | <b>0.28</b>         | <b>0.97</b>         |
| IR-overall moderate/strong               | 241                  | 77          | 32.0        | <b>0.53</b>     | <b>0.29</b>         | <b>0.98</b>         |
| pIGF1R/pIR-cyto negative                 | 352                  | 111         | 31.5        | 1.00 (Ref)      |                     |                     |
| pIGF1R/pIR-cyto positive <sup>d</sup>    | 136                  | 51          | 37.5        | 1.24            | 0.89                | 1.74                |
| pIGF1R/pIR-overall negative              | 325                  | 98          | 30.2        | 1.00 (Ref)      |                     |                     |
| pIGF1R/pIR-overall positive <sup>e</sup> | 163                  | 64          | 39.3        | <b>1.40</b>     | <b>1.02</b>         | <b>1.92</b>         |
| pIGF1R/pIR-memb negative                 | 356                  | 113         | 31.7        | 1.00 (Ref)      |                     |                     |
| pIGF1R/pIR-memb <50% positive            | 121                  | 45          | 37.2        | 1.22            | 0.86                | 1.72                |
| pIGF1R/pIR-memb ≥50% positive            | 11                   | 4           | 36.4        | 0.77            | 0.28                | 2.11                |
| IGF1R-cyto negative                      | 113                  | 46          | 40.7        | 1.00 (Ref)      |                     |                     |
| IGF1R-cyto positive <sup>d</sup>         | 383                  | 121         | 31.6        | 0.78            | 0.56                | 1.10                |
| IGF1R-overall negative                   | 113                  | 46          | 40.7        | 1.00 (Ref)      |                     |                     |
| IGF1R-overall weak                       | 301                  | 98          | 32.6        | 0.79            | 0.56                | 1.12                |
| IGF1R-overall moderate/strong            | 80                   | 22          | 27.5        | 0.75            | 0.45                | 1.26                |
| IGF1R-memb negative                      | 239                  | 80          | 33.5        | 1.00 (Ref)      |                     |                     |
| IGF1R-memb <50% positive                 | 170                  | 61          | 35.9        | 1.17            | 0.84                | 1.64                |
| IGF1R-memb ≥50% positive                 | 87                   | 26          | 29.9        | 0.90            | 0.57                | 1.40                |

<sup>a</sup>Case numbers may not sum to 524 due to missing data.

<sup>b</sup>Models were adjusted for age at enrollment (continuous), FIGO stage (II [Ref], III, IV) and grade (1, 2, 3 [Ref]).

<sup>c</sup>The combined ER/PR staining refers to glandular cell staining only.

<sup>d</sup>Only weak staining was observed.

<sup>e</sup>This category refers to weak/moderate staining.

Abbreviations: CI confidence interval, cyto cytoplasmic, ER estrogen receptor alpha, HR hazard ratio, IGF1R insulin-like growth factor 1 receptor, IR insulin receptor, memb membranous, nucl nuclear, pIGF1R/pIR phosphorylated IGF1R/insulin receptor, PR, progesterone receptor.

**Table S2.** Gene expression<sup>a</sup> of IGF axis genes in endometrial cancer tissues in relation to progression-free survival

|               | Total N | Recurrent N | Recurrent % | HR <sup>b</sup> | 95% CI <sup>b</sup> | 95% CI <sup>b</sup> |
|---------------|---------|-------------|-------------|-----------------|---------------------|---------------------|
| <b>IGF1</b>   |         |             |             |                 |                     |                     |
| <50th pctl    | 179     | 64          | 36          | 1.00 (Ref)      |                     |                     |
| ≥50th pctl    | 179     | 58          | 32          | 0.98            | 0.68                | 1.40                |
| <b>IGF2</b>   |         |             |             |                 |                     |                     |
| <50th pctl    | 179     | 74          | 41          | 1.00 (Ref)      |                     |                     |
| ≥50th pctl    | 179     | 48          | 27          | 0.75            | 0.52                | 1.08                |
| <b>IGFBP1</b> |         |             |             |                 |                     |                     |
| <50th pctl    | 179     | 62          | 35          | 1.00 (Ref)      |                     |                     |
| ≥50th pctl    | 179     | 60          | 34          | 1.10            | 0.77                | 1.57                |
| <b>IGFBP3</b> |         |             |             |                 |                     |                     |
| <50th pctl    | 179     | 67          | 37          | 1.00 (Ref)      |                     |                     |
| ≥50th pctl    | 179     | 55          | 31          | 1.00            | 0.69                | 1.43                |

<sup>a</sup>Gene expression values (normalized to *PPIB*) as detected by qPCR.

<sup>b</sup>Models were adjusted for age at enrollment (continuous) and FIGO stage (II [Ref], III, IV).

Abbreviations: CI confidence interval, HR hazard ratio, *IGF1* insulin-like growth factor 1, *IGF2* insulin-like growth factor 2, *IGFBP1* *IGFBP3* insulin-like growth factor binding proteins 1 and 3, respectively; qPCR quantitative real time reverse transcription PCR.

**Table S3: Adjusted hazard ratios (95% CI) for the associations of preoperative circulating levels of insulin/IGF and sex hormone axis components in relation to endometrioid adenocarcinoma progression-free survival**

|                              | Quantile 1 | Quantile 2              | Quantile 3              | Quantile 4              | <i>P</i> -trend <sup>a</sup> |
|------------------------------|------------|-------------------------|-------------------------|-------------------------|------------------------------|
| <b>IGFBP-3</b>               |            |                         |                         |                         |                              |
| Quartile cut points (ng/ml)  | <2046.2    | ≥2046.2-<2529.6         | ≥2529.6-<3127.4         | ≥3127.4                 |                              |
| Total <i>N</i>               | 202        | 202                     | 202                     | 202                     |                              |
| Recurrent <i>N</i> (%)       | 88 (43.6)  | 62 (30.7)               | 62 (30.7)               | 68 (33.7)               |                              |
| HR (95% CI) <sup>b</sup>     | 1.00 (Ref) | 0.73 (0.52-1.01)        | <b>0.69 (0.50-0.96)</b> | 0.78 (0.57-1.08)        | 0.09                         |
| <b>IGF-I</b>                 |            |                         |                         |                         |                              |
| Quartile cut points (ng/ml)  | <84.4      | ≥84.4-<109.6            | ≥109.6-<137.8           | ≥137.8                  |                              |
| Total <i>N</i>               | 201        | 202                     | 201                     | 203                     |                              |
| Recurrent <i>N</i> (%)       | 83 (41.3)  | 76 (37.6)               | 65 (32.3)               | 56 (27.6)               |                              |
| HR (95% CI) <sup>b</sup>     | 1.00 (Ref) | 0.93 (0.68-1.27)        | 0.82 (0.60-1.14)        | <b>0.66 (0.47-0.92)</b> | <b>0.01</b>                  |
| <b>Insulin<sup>c</sup></b>   |            |                         |                         |                         |                              |
| Tertile cut points (uU/ml)   | <3.9       | ≥3.9-<9.2               | ≥9.2                    |                         |                              |
| Total <i>N</i>               | 52         | 52                      | 53                      |                         |                              |
| Recurrent <i>N</i> (%)       | 20 (38.5)  | 18 (34.6)               | 19 (35.9)               |                         |                              |
| HR (95% CI) <sup>b</sup>     | 1.00 (Ref) | 0.83 (0.44-1.59)        | 1.25 (0.63-2.45)        | N/A                     | <b>0.01<sup>d</sup></b>      |
| <b>Estradiol<sup>e</sup></b> |            |                         |                         |                         |                              |
| Tertile cut points (pg/ml)   | <14.5      | ≥14.5-<24.5             | ≥24.5                   |                         |                              |
| Total <i>N</i>               | 124        | 128                     | 131                     |                         |                              |
| Recurrent <i>N</i> (%)       | 48 (38.7)  | 49 (38.3)               | 49 (37.4)               |                         |                              |
| HR (95% CI) <sup>b</sup>     | 1.00 (Ref) | 1.15 (0.77-1.73)        | <b>1.55 (1.02-2.36)</b> | N/A                     | 0.69                         |
| <b>Estrone<sup>e</sup></b>   |            |                         |                         |                         |                              |
| Tertile cut points (pg/ml)   | <40.5      | ≥40.5-<84.0             | ≥84.0                   |                         |                              |
| Total <i>N</i>               | 128        | 129                     | 129                     |                         |                              |
| Recurrent <i>N</i> (%)       | 47 (36.7)  | 53 (41.1)               | 49 (38.0)               |                         |                              |
| HR (95% CI) <sup>b</sup>     | 1.00 (Ref) | <b>1.61 (1.08-2.39)</b> | 1.21 (0.80-1.83)        | N/A                     | 0.68                         |
| <b>SHBG<sup>e</sup></b>      |            |                         |                         |                         |                              |
| Tertile cut points (nmol/L)  | <412.1     | ≥412.1-<639.5           | ≥639.5                  |                         |                              |
| Total <i>N</i>               | 130        | 131                     | 131                     |                         |                              |
| Recurrent <i>N</i> (%)       | 44 (33.9)  | 58 (44.3)               | 49 (37.4)               |                         |                              |
| HR (95% CI) <sup>b</sup>     | 1.00 (Ref) | 1.12 (0.75-1.68)        | 0.85 (0.56-1.29)        | N/A                     | 0.50                         |

<sup>a</sup>*P*-trend based on a continuous variable.

<sup>b</sup>Models were adjusted for age at enrollment (continuous), FIGO stage (II [Ref], III, IV) and grade (1, 2, 3 [Ref]).

<sup>c</sup>Restricted to fasting cases.

<sup>d</sup>Following log transformation, the *P*-trend for circulating insulin was no longer significant.

<sup>e</sup>Restricted to postmenopausal women who were not using hormones.

Abbreviations: BMI body mass index, CI confidence interval, E2 estradiol, IGF-I insulin-like growth factor-I, IGFBP-3 insulin-like growth factor binding protein-3, HR hazard ratio, SHBG sex hormone-binding globulin.

**Table S4: Adjusted hazard ratios (95% CI) for the associations between immunohistochemical staining of insulin/IGF and sex hormone axis factors in endometrial cancer in relation to progression-free survival (overall and stratified by stage)**

|                                          | Total N <sup>a</sup> | All cases (N=524) |                 |                     | SII cases (N=186)   |                 |                     | SII/III cases (N=472) |                 |                     | SIII/IV cases (N=345) |                 |                     |                     |
|------------------------------------------|----------------------|-------------------|-----------------|---------------------|---------------------|-----------------|---------------------|-----------------------|-----------------|---------------------|-----------------------|-----------------|---------------------|---------------------|
|                                          |                      | Recurrent N       | HR <sup>b</sup> | 95% CI <sup>b</sup> | 95% CI <sup>b</sup> | HR <sup>b</sup> | 95% CI <sup>b</sup> | 95% CI <sup>b</sup>   | HR <sup>b</sup> | 95% CI <sup>b</sup> | 95% CI <sup>b</sup>   | HR <sup>b</sup> | 95% CI <sup>b</sup> | 95% CI <sup>b</sup> |
| ER (gland) negative                      | 351                  | 130               | 1.00 (Ref)      |                     |                     | 1.00 (Ref)      |                     |                       | 1.00 (Ref)      |                     |                       | 1.00 (Ref)      |                     |                     |
| ER (gland) positive                      | 171                  | 45                | <b>0.67</b>     | <b>0.47</b>         | <b>0.95</b>         | 0.60            | 0.30                | 1.21                  | <b>0.64</b>     | <b>0.43</b>         | <b>0.94</b>           | 0.71            | 0.47                | 1.07                |
| ER (stroma) negative                     | 500                  | 170               | 1.00 (Ref)      |                     |                     | 1.00 (Ref)      |                     |                       | 1.00 (Ref)      |                     |                       | 1.00 (Ref)      |                     |                     |
| ER (stroma) positive                     | 22                   | 5                 | 0.73            | 0.30                | 1.81                | NA              | NA                  | NA                    | 0.49            | 0.15                | 1.54                  | 1.04            | 0.42                | 2.59                |
| PR (gland) negative                      | 241                  | 96                | 1.00 (Ref)      |                     |                     | 1.00 (Ref)      |                     |                       | 1.00 (Ref)      |                     |                       | 1.00 (Ref)      |                     |                     |
| PR (gland) positive                      | 283                  | 80                | 0.81            | 0.59                | 1.11                | 1.08            | 0.54                | 2.18                  | 0.77            | 0.54                | 1.10                  | 0.70            | 0.48                | 1.00                |
| PR (stroma) negative                     | 483                  | 167               | 1.00 (Ref)      |                     |                     | 1.00 (Ref)      |                     |                       | 1.00 (Ref)      |                     |                       | 1.00 (Ref)      |                     |                     |
| PR (stroma) positive                     | 41                   | 9                 | 0.79            | 0.40                | 1.56                | 0.50            | 0.12                | 2.10                  | 0.65            | 0.30                | 1.41                  | 0.84            | 0.39                | 1.81                |
| ER negative/PR negative <sup>c</sup>     | 206                  | 83                | 1.00 (Ref)      |                     |                     | 1.00 (Ref)      |                     |                       | 1.00 (Ref)      |                     |                       | 1.00 (Ref)      |                     |                     |
| ER negative/PR positive <sup>c</sup>     | 144                  | 46                | 0.94            | 0.64                | 1.39                | 1.42            | 0.63                | 3.22                  | 0.91            | 0.59                | 1.41                  | 0.80            | 0.51                | 1.24                |
| ER positive/PR negative <sup>c</sup>     | 34                   | 13                | 0.83            | 0.45                | 1.51                | 0.60            | 0.08                | 4.77                  | 0.79            | 0.37                | 1.66                  | 0.95            | 0.51                | 1.78                |
| ER positive/PR positive <sup>c</sup>     | 136                  | 32                | <b>0.61</b>     | <b>0.40</b>         | <b>0.94</b>         | 0.77            | 0.33                | 1.79                  | <b>0.59</b>     | <b>0.37</b>         | <b>0.94</b>           | <b>0.55</b>     | <b>0.33</b>         | <b>0.92</b>         |
| IR-cyto negative                         | 23                   | 12                | 1.00 (Ref)      |                     |                     | 1.00 (Ref)      |                     |                       | 1.00 (Ref)      |                     |                       | 1.00 (Ref)      |                     |                     |
| IR-cyto weak                             | 412                  | 137               | <b>0.51</b>     | <b>0.28</b>         | <b>0.94</b>         | <b>0.31</b>     | <b>0.11</b>         | <b>0.88</b>           | <b>0.48</b>     | <b>0.26</b>         | <b>0.88</b>           | 0.73            | 0.35                | 1.50                |
| IR-cyto moderate/strong                  | 82                   | 25                | <b>0.47</b>     | <b>0.23</b>         | <b>0.93</b>         | <b>0.19</b>     | <b>0.05</b>         | <b>0.77</b>           | <b>0.48</b>     | <b>0.24</b>         | <b>0.96</b>           | 0.64            | 0.28                | 1.45                |
| IR-nucl negative                         | 84                   | 35                | 1.00 (Ref)      |                     |                     | 1.00 (Ref)      |                     |                       | 1.00 (Ref)      |                     |                       | 1.00 (Ref)      |                     |                     |
| IR-nucl <50% positive                    | 130                  | 46                | 0.67            | 0.43                | 1.04                | 0.90            | 0.28                | 2.83                  | 0.66            | 0.40                | 1.07                  | 0.71            | 0.44                | 1.15                |
| IR-nucl ≥50% positive                    | 303                  | 93                | <b>0.62</b>     | <b>0.42</b>         | <b>0.92</b>         | 1.01            | 0.41                | 2.45                  | <b>0.55</b>     | <b>0.36</b>         | <b>0.84</b>           | <b>0.60</b>     | <b>0.38</b>         | <b>0.93</b>         |
| IR-overall negative                      | 24                   | 12                | 1.00 (Ref)      |                     |                     | 1.00 (Ref)      |                     |                       | 1.00 (Ref)      |                     |                       | 1.00 (Ref)      |                     |                     |
| IR-overall weak                          | 252                  | 85                | <b>0.53</b>     | <b>0.28</b>         | <b>0.97</b>         | <b>0.19</b>     | <b>0.06</b>         | <b>0.61</b>           | <b>0.47</b>     | <b>0.25</b>         | <b>0.88</b>           | 0.81            | 0.39                | 1.69                |
| IR-overall moderate/strong               | 241                  | 77                | <b>0.53</b>     | <b>0.29</b>         | <b>0.98</b>         | 0.37            | 0.13                | 1.07                  | <b>0.52</b>     | <b>0.28</b>         | <b>0.97</b>           | 0.69            | 0.33                | 1.46                |
| pIGF1R/pIR-cyto negative                 | 352                  | 111               | 1.00 (Ref)      |                     |                     | 1.00 (Ref)      |                     |                       | 1.00 (Ref)      |                     |                       | 1.00 (Ref)      |                     |                     |
| pIGF1R/pIR-cyto positive <sup>d</sup>    | 136                  | 51                | 1.24            | 0.89                | 1.74                | 1.18            | 0.57                | 2.46                  | 1.35            | 0.93                | 1.95                  | 1.28            | 0.88                | 1.86                |
| pIGF1R/pIR-overall negative              | 325                  | 98                | 1.00 (Ref)      |                     |                     | 1.00 (Ref)      |                     |                       | 1.00 (Ref)      |                     |                       | 1.00 (Ref)      |                     |                     |
| pIGF1R/pIR-overall positive <sup>e</sup> | 163                  | 64                | <b>1.40</b>     | <b>1.02</b>         | <b>1.92</b>         | 1.23            | 0.60                | 2.52                  | <b>1.45</b>     | <b>1.02</b>         | <b>2.07</b>           | <b>1.48</b>     | <b>1.04</b>         | <b>2.11</b>         |
| pIGF1R/pIR-memb negative                 | 356                  | 113               | 1.00 (Ref)      |                     |                     | 1.00 (Ref)      |                     |                       | 1.00 (Ref)      |                     |                       | 1.00 (Ref)      |                     |                     |
| pIGF1R/pIR-memb <50% positive            | 121                  | 45                | 1.22            | 0.86                | 1.72                | 1.29            | 0.60                | 2.77                  | 1.30            | 0.88                | 1.90                  | 1.22            | 0.82                | 1.80                |
| pIGF1R/pIR-memb ≥50% positive            | 11                   | 4                 | 0.77            | 0.28                | 2.11                | NA              | NA                  | NA                    | 1.77            | 0.55                | 5.65                  | 1.23            | 0.45                | 3.35                |

<sup>a</sup>Case numbers may not sum to total due to missing data.

<sup>b</sup>Models (all cases) were adjusted for age at enrollment (continuous), FIGO stage (II [Ref], III, IV) and grade (1, 2, 3 [Ref]). Models stratified by stage were adjusted for age and grade only.

<sup>c</sup>The combined ER/PR staining refers to glandular cell staining only.

<sup>d</sup>Only weak staining was observed.

<sup>e</sup>This category refers to weak/moderate staining.

**Table S4 (continued): Adjusted hazard ratios (95% CI) for the associations between immunohistochemical staining of insulin/IGF and sex hormone axis factors in endometrial cancer in relation to progression-free survival (overall and stratified by stage)**

|                                  | Total<br>N <sup>a</sup> | All cases (N=524) |                 |                        | SII cases (N=186)      |                 |                     | SII/III cases (N=472) |                 |                     | SIII/IV cases (N=345) |                 |                     |                     |
|----------------------------------|-------------------------|-------------------|-----------------|------------------------|------------------------|-----------------|---------------------|-----------------------|-----------------|---------------------|-----------------------|-----------------|---------------------|---------------------|
|                                  |                         | Recurrent N       | HR <sup>b</sup> | 95%<br>CI <sup>b</sup> | 95%<br>CI <sup>b</sup> | HR <sup>b</sup> | 95% CI <sup>b</sup> | 95% CI <sup>b</sup>   | HR <sup>b</sup> | 95% CI <sup>b</sup> | 95% CI <sup>b</sup>   | HR <sup>b</sup> | 95% CI <sup>b</sup> | 95% CI <sup>b</sup> |
| IGF1R-cyto negative              | 113                     | 46                | 1.00 (Ref)      |                        |                        | 1.00 (Ref)      |                     |                       | 1.00 (Ref)      |                     |                       | 1.00 (Ref)      |                     |                     |
| IGF1R-cyto positive <sup>d</sup> | 383                     | 121               | 0.78            | 0.56                   | 1.10                   | 0.63            | 0.31                | 1.27                  | 0.85            | 0.57                | 1.25                  | 0.91            | 0.62                | 1.35                |
| IGF1R-overall negative           | 113                     | 46                | 1.00 (Ref)      |                        |                        | 1.00 (Ref)      |                     |                       | 1.00 (Ref)      |                     |                       | 1.00 (Ref)      |                     |                     |
| IGF1R-overall weak               | 301                     | 98                | 0.79            | 0.56                   | 1.12                   | 0.58            | 0.28                | 1.22                  | 0.87            | 0.58                | 1.31                  | 0.96            | 0.64                | 1.43                |
| IGF1R-overall moderate/strong    | 80                      | 22                | 0.75            | 0.45                   | 1.26                   | 0.80            | 0.32                | 2.03                  | 0.74            | 0.41                | 1.31                  | 0.72            | 0.38                | 1.34                |
| IGF1R-memb negative              | 239                     | 80                | 1.00 (Ref)      |                        |                        | 1.00 (Ref)      |                     |                       | 1.00 (Ref)      |                     |                       | 1.00 (Ref)      |                     |                     |
| IGF1R-memb <50% positive         | 170                     | 61                | 1.17            | 0.84                   | 1.64                   | 0.90            | 0.44                | 1.86                  | 1.24            | 0.85                | 1.82                  | 1.34            | 0.92                | 1.96                |
| IGF1R-memb ≥50% positive         | 87                      | 26                | 0.90            | 0.57                   | 1.40                   | 1.17            | 0.50                | 2.77                  | 1.13            | 0.69                | 1.86                  | 0.91            | 0.54                | 1.54                |

<sup>a</sup>Case numbers may not sum to total due to missing data.

<sup>b</sup>Models (all cases) were adjusted for age at enrollment (continuous), FIGO stage (II [Ref], III, IV) and grade (1, 2, 3 [Ref]). Models stratified by stage were adjusted for age and grade only.

<sup>c</sup>The combined ER/PR staining refers to glandular cell staining only.

<sup>d</sup>Only weak staining was observed.

<sup>e</sup>This category refers to weak/moderate staining.

Abbreviations: CI confidence interval, cyto cytoplasmic, ER estrogen receptor alpha, HR hazard ratio, IGF1R insulin-like growth factor 1 receptor, IR insulin receptor, memb membranous, NA not available, nucl nuclear, pIGF1R/pIR phosphorylated IGF1R/insulin receptor, PR, progesterone receptor.

**Table S5: Adjusted hazard ratios (95% CI) for the associations of preoperative circulating levels of insulin/IGF and sex hormone axis components in relation to endometrioid adenocarcinoma progression-free survival (overall and stratified by stage)**

|                              | Total<br>N | All cases   |                          | SII cases                | SII/III cases            | SIII/IV cases            |
|------------------------------|------------|-------------|--------------------------|--------------------------|--------------------------|--------------------------|
|                              |            | Recurrent N | HR (95% CI) <sup>b</sup> |
| <b>IGFBP-3</b>               |            |             |                          |                          |                          |                          |
| Quantile 1                   | 202        | 88          | 1.00 (Ref)               | 1.00 (Ref)               | 1.00 (Ref)               | 1.00 (Ref)               |
| Quantile 2                   | 202        | 62          | 0.73 (0.52-1.01)         | 0.66 (0.33-1.33)         | 0.71 (0.49-1.02)         | 0.70 (0.49-1.01)         |
| Quantile 3                   | 202        | 62          | <b>0.69 (0.50-0.96)</b>  | 0.53 (0.25-1.13)         | 0.71 (0.49-1.03)         | 0.76 (0.53-1.09)         |
| Quantile 4                   | 202        | 68          | 0.78 (0.57-1.08)         | 0.34 (0.15-0.77)         | 0.71 (0.49-1.02)         | 0.76 (0.53-1.09)         |
| P-trend <sup>a</sup>         |            |             | 0.09                     | 0.005                    | 0.02                     | 0.26                     |
| <b>IGF-I</b>                 |            |             |                          |                          |                          |                          |
| Quantile 1                   | 201        | 83          | 1.00 (Ref)               | 1.00 (Ref)               | 1.00 (Ref)               | 1.00 (Ref)               |
| Quantile 2                   | 202        | 76          | 0.93 (0.68-1.27)         | 1.13 (0.56-2.28)         | 1.05 (0.73-1.49)         | 0.87 (0.62-1.24)         |
| Quantile 3                   | 201        | 65          | 0.82 (0.60-1.14)         | 0.80 (0.38-1.66)         | 0.84 (0.58-1.21)         | 0.81 (0.56-1.16)         |
| Quantile 4                   | 203        | 56          | <b>0.66 (0.47-0.92)</b>  | 0.44 (0.19-1.04)         | <b>0.66 (0.45-0.98)</b>  | <b>0.69 (0.47-1.00)</b>  |
| P-trend <sup>a</sup>         |            |             | 0.01                     | 0.02                     | 0.01                     | 0.047                    |
| <b>Insulin<sup>c</sup></b>   |            |             |                          |                          |                          |                          |
| Quantile 1                   | 52         | 20          | 1.00 (Ref)               | 1.00 (Ref)               | 1.00 (Ref)               | 1.00 (Ref)               |
| Quantile 2                   | 52         | 18          | 0.83 (0.44-1.59)         | 0.26 (0.02-2.99)         | 0.72 (0.33-1.58)         | 1.09 (0.55-2.14)         |
| Quantile 3                   | 53         | 19          | 1.25 (0.63-2.45)         | 6.89 (0.69-68.83)        | 1.30 (0.61-2.77)         | 1.03 (0.48-2.20)         |
| P-trend <sup>d</sup>         |            |             |                          | 0.21                     | 0.22                     | 0.32                     |
| <b>Estradiol<sup>e</sup></b> |            |             |                          |                          |                          |                          |
| Quantile 1                   | 124        | 48          | 1.00 (Ref)               | 1.00 (Ref)               | 1.00 (Ref)               | 1.00 (Ref)               |
| Quantile 2                   | 128        | 49          | 1.15 (0.77-1.73)         | 1.39 (0.53-3.60)         | 1.02 (0.65-1.60)         | 1.20 (0.76-1.89)         |
| Quantile 3                   | 131        | 49          | <b>1.55 (1.02-2.36)</b>  | 2.28 (0.86-6.07)         | 1.42 (0.89-2.28)         | <b>1.72 (1.07-2.78)</b>  |
| P-trend <sup>a</sup>         |            |             | 0.69                     | 0.41                     | 0.67                     | 0.71                     |
| <b>Estrone<sup>e</sup></b>   |            |             |                          |                          |                          |                          |
| Quantile 1                   | 128        | 47          | 1.00 (Ref)               | 1.00 (Ref)               | 1.00 (Ref)               | 1.00 (Ref)               |
| Quantile 2                   | 129        | 53          | <b>1.61 (1.08-2.39)</b>  | 1.16 (0.48-2.79)         | 1.49 (0.96-2.32)         | 1.50 (0.96-2.33)         |
| Quantile 3                   | 129        | 49          | 1.21 (0.80-1.83)         | 1.73 (0.74-4.06)         | 1.20 (0.75-1.92)         | 1.16 (0.73-1.85)         |
| P-trend <sup>a</sup>         |            |             | 0.68                     | 0.90                     | 0.53                     | 0.32                     |
| <b>SHBG<sup>e</sup></b>      |            |             |                          |                          |                          |                          |
| Quantile 1                   | 130        | 44          | 1.00 (Ref)               | 1.00 (Ref)               | 1.00 (Ref)               | 1.00 (Ref)               |
| Quantile 2                   | 131        | 58          | 1.12 (0.75-1.68)         | 2.37 (0.93-6.06)         | 1.24 (0.80-1.92)         | 1.05 (0.67-1.62)         |
| Quantile 3                   | 131        | 49          | 0.85 (0.56-1.29)         | 1.88 (0.72-4.94)         | 0.86 (0.54-1.38)         | 0.84 (0.53-1.33)         |
| P-trend <sup>a</sup>         |            |             | 0.50                     | 0.85                     | 0.45                     | 0.65                     |

<sup>a</sup>P-trend based on a continuous variable.

<sup>b</sup>Models (all cases) were adjusted for age at enrollment (continuous), FIGO stage (II [Ref], III, IV) and grade (1, 2, 3 [Ref]). Models stratified by stage were adjusted for age and grade only.

<sup>c</sup>Restricted to fasting cases.

<sup>d</sup>P-trend for circulating insulin refers to the log transformed data.

<sup>e</sup>Restricted to postmenopausal women who were not using hormones.

Abbreviations: BMI body mass index, CI confidence interval, E2 estradiol, IGF-I insulin-like growth factor-I, IGFBP-3 insulin-like growth factor binding protein-3, HR hazard ratio, SHBG sex hormone-binding globulin.

**Table S6:** Pearson's correlation coefficients for serologic insulin/IGF and sex hormone axis factors and tumor IGF-axis gene expression levels for 357 women with advanced stage endometrioid adenocarcinoma

| Serologic factors                | Tumor gene expression (normalized <i>PPIB</i> ) |             |               |               |
|----------------------------------|-------------------------------------------------|-------------|---------------|---------------|
|                                  | <i>IGF1</i>                                     | <i>IGF2</i> | <i>IGFBP1</i> | <i>IGFBP3</i> |
| IGF-I, $\rho$                    | -0.02538                                        | 0.07628     | -0.04179      | -0.03672      |
| IGF-I, p-value                   | 0.6332                                          | 0.1509      | 0.4319        | 0.4898        |
| IGFBP-3, $\rho$                  | -0.07751                                        | -0.00586    | -0.09221      | -0.01351      |
| IGFBP-3, p-value                 | 0.1438                                          | 0.9121      | 0.0819        | 0.7991        |
| Insulin <sup>a</sup> , $\rho$    | -0.04833                                        | -0.06717    | -0.11305      | -0.09723      |
| Insulin <sup>a</sup> , p-value   | 0.7068                                          | 0.6009      | 0.3777        | 0.4484        |
| Estradiol <sup>b</sup> , $\rho$  | -0.06450                                        | -0.05333    | -0.04691      | -0.07375      |
| Estradiol <sup>b</sup> , p-value | 0.3992                                          | 0.4859      | 0.5400        | 0.3349        |
| Estrone <sup>b</sup> , $\rho$    | -0.05259                                        | -0.02919    | -0.04590      | -0.03967      |
| Estrone <sup>b</sup> , p-value   | 0.4820                                          | 0.6965      | 0.5395        | 0.5960        |
| SHBG <sup>b</sup> , $\rho$       | 0.10031                                         | 0.08870     | 0.04918       | -0.02331      |
| SHBG <sup>b</sup> , P-value      | 0.1791                                          | 0.2351      | 0.5109        | 0.7554        |

<sup>a</sup>Restricted to individuals (N=63) who were fasting.

<sup>b</sup>Restricted to individuals (N=181) who were postmenopausal and non-users of hormone therapy.

$\rho$  is the Pearson's correlation coefficient.

P-value is for the probability of observing this correlation coefficient or one more extreme under the null hypothesis ( $H_0$ ) that the correlation ( $\rho$ ) is 0.

**Table S7:** Pearson's correlation coefficients for insulin/IGF and sex hormone axis serologic and tumor immunohistochemical staining in 523 women with advanced stage endometrioid adenocarcinoma

| Tumor proteins               | Serologic factors |          |                      |                        |                      |                   |
|------------------------------|-------------------|----------|----------------------|------------------------|----------------------|-------------------|
|                              | IGF-I             | IGFBP-3  | Insulin <sup>a</sup> | Estradiol <sup>b</sup> | Estrone <sup>b</sup> | SHBG <sup>b</sup> |
| ER (gland) H-score, $\rho$   | 0.04422           | 0.06972  | -0.07296             | -0.07468               | 0.01427              | -0.03890          |
| ER (gland) H-score, p-value  | 0.3142            | 0.1119   | 0.4595               | 0.2319                 | 0.8179               | 0.5275            |
| ER (stroma) H-score, $\rho$  | 0.08221           | 0.07478  | 0.08124              | -0.00656               | 0.04562              | -0.02286          |
| ER (stroma) H-score, p-value | 0.0610            | 0.0881   | 0.4100               | 0.9165                 | 0.4613               | 0.7105            |
| PR (gland) H-score, $\rho$   | -0.03571          | -0.01402 | -0.01337             | 0.17932                | 0.16104              | -0.19431          |
| PR (gland) H-score, p-value  | 0.4155            | 0.7490   | 0.8918               | 0.0039                 | 0.0089               | 0.0014            |
| PR (stroma) H-score, $\rho$  | 0.01116           | -0.00381 | 0.03026              | 0.06660                | 0.04708              | -0.07085          |
| PR (stroma) H-score, p-value | 0.7991            | 0.9307   | 0.7581               | 0.2866                 | 0.4471               | 0.2495            |
| IR-cyto, $\rho$              | 0.03129           | -0.00149 | 0.15406              | 0.02816                | 0.06781              | -0.02213          |
| IR-cyto, p-value             | 0.4787            | 0.9730   | 0.1184               | 0.6551                 | 0.2769               | 0.7220            |
| IR-nucl, $\rho$              | 0.00183           | 0.03991  | -0.04498             | -0.13378               | 0.01926              | 0.11814           |
| IR-nucl, p-value             | 0.9670            | 0.3656   | 0.6503               | 0.0331                 | 0.7577               | 0.0566            |
| IR-overall, $\rho$           | -0.00575          | -0.01309 | -0.15414             | -0.02032               | -0.04221             | 0.08762           |
| IR-overall, p-value          | 0.8964            | 0.7667   | 0.1182               | 0.7473                 | 0.4988               | 0.1581            |
| pIGF1R/pIR-cyto, $\rho$      | -0.04791          | -0.04915 | -0.09418             | -0.04008               | -0.04282             | 0.08603           |
| pIGF1R/pIR-cyto, p-value     | 0.2919            | 0.2790   | 0.3563               | 0.5299                 | 0.4995               | 0.1717            |
| pIGF1R/pIR-overall, $\rho$   | 0.00636           | -0.01590 | -0.06299             | -0.05134               | -0.05165             | 0.12794           |
| pIGF1R/pIR-overall, p-value  | 0.8888            | 0.7263   | 0.5378               | 0.4208                 | 0.4152               | 0.0416            |
| pIGF1R/pIR-memb, $\rho$      | 0.00991           | 0.01455  | -0.03813             | -0.06813               | -0.04553             | 0.13227           |
| pIGF1R/pIR-memb, p-value     | 0.8275            | 0.7488   | 0.7094               | 0.2852                 | 0.4726               | 0.0351            |
| IGF1R-cyto, $\rho$           | 0.06978           | 0.01867  | 0.11662              | 0.02091                | 0.05623              | 0.03461           |
| IGF1R-cyto, p-value          | 0.1214            | 0.6787   | 0.2407               | 0.7462                 | 0.3799               | 0.5867            |
| IGF1R-overall, $\rho$        | 0.05384           | -0.01833 | 0.06442              | 0.02832                | 0.05664              | -0.00470          |
| IGF1R-overall, p-value       | 0.2333            | 0.6848   | 0.5179               | 0.6618                 | 0.3773               | 0.9412            |
| IGF1R-memb, $\rho$           | 0.05230           | -0.02157 | 0.10340              | 0.03885                | 0.07566              | 0.04238           |
| IGF1R-memb, p-value          | 0.2459            | 0.6321   | 0.2986               | 0.5475                 | 0.2371               | 0.5057            |

<sup>a</sup>Restricted to individuals (N=106) who were fasting.

<sup>b</sup>Restricted to individuals (N=266) who were postmenopausal and non-users of hormone therapy.

$\rho$  is the Pearson's correlation coefficient.

P-value is for the probability of observing this correlation coefficient or one more extreme under the null hypothesis (H0) that the correlation (Rho) is 0.

**Table S8:** Pearson's correlation coefficients for insulin/IGF and sex hormone axis tumor gene expression levels and immunohistochemical staining in 279 women with advanced stage endometrioid adenocarcinoma

| IHC staining                 | Gene expression (normalized <i>PPIB</i> ) |             |               |               |
|------------------------------|-------------------------------------------|-------------|---------------|---------------|
|                              | <i>IGF1</i>                               | <i>IGF2</i> | <i>IGFBP1</i> | <i>IGFBP3</i> |
| ER (gland) H-score, $\rho$   | 0.06309                                   | -0.00119    | -0.05642      | 0.05686       |
| ER (gland) H-score, p-value  | 0.2937                                    | 0.9843      | 0.3478        | 0.3440        |
| ER (stroma) H-score, $\rho$  | 0.01286                                   | -0.00835    | 0.04226       | 0.05816       |
| ER (stroma) H-score, p-value | 0.8306                                    | 0.8895      | 0.4821        | 0.3331        |
| PR (gland) H-score, $\rho$   | 0.02492                                   | -0.00329    | -0.11773      | -0.01318      |
| PR (gland) H-score, p-value  | 0.6791                                    | 0.9565      | 0.0499        | 0.8268        |
| PR (stroma) H-score, $\rho$  | 0.02682                                   | -0.01218    | -0.00725      | 0.00245       |
| PR (stroma) H-score, p-value | 0.6561                                    | 0.8398      | 0.9042        | 0.9676        |
| IR-cyto, $\rho$              | 0.03507                                   | -0.05188    | 0.00829       | -0.00756      |
| IR-cyto, p-value             | 0.5626                                    | 0.3914      | 0.8912        | 0.9007        |
| IR-nucl, $\rho$              | 0.09983                                   | -0.04015    | 0.09223       | 0.03893       |
| IR-nucl, p-value             | 0.0985                                    | 0.5073      | 0.1271        | 0.5203        |
| IR-overall, $\rho$           | 0.13209                                   | 0.03540     | 0.04748       | 0.08148       |
| IR-overall, p-value          | 0.0285                                    | 0.5589      | 0.4329        | 0.1779        |
| pIGF1R/pIR-cyto, $\rho$      | -0.06088                                  | -0.06035    | -0.01100      | -0.04026      |
| pIGF1R/pIR-cyto, p-value     | 0.3310                                    | 0.3352      | 0.8608        | 0.5205        |
| pIGF1R/pIR-overall, $\rho$   | -0.06882                                  | -0.06899    | -0.03497      | -0.02763      |
| pIGF1R/pIR-overall, p-value  | 0.2717                                    | 0.2705      | 0.5768        | 0.6593        |
| pIGF1R/pIR-memb, $\rho$      | -0.06305                                  | -0.06119    | -0.06527      | -0.02388      |
| pIGF1R/pIR-memb, p-value     | 0.3140                                    | 0.3285      | 0.2972        | 0.7032        |
| IGF1R-cyto, $\rho$           | 0.14067                                   | -0.08557    | 0.05005       | 0.05005       |
| IGF1R-cyto, p-value          | 0.0215                                    | 0.1633      | 0.4154        | 0.4154        |
| IGF1R-overall, $\rho$        | 0.11433                                   | -0.07402    | 0.05394       | 0.05394       |
| IGF1R-overall, p-value       | 0.0626                                    | 0.2289      | 0.3809        | 0.3809        |
| IGF1R-memb, $\rho$           | 0.05146                                   | -0.03200    | -0.00347      | -0.00347      |
| IGF1R-memb, p-value          | 0.4023                                    | 0.6027      | 0.9550        | 0.9550        |

$\rho$  is the Pearson's correlation coefficient.

P-value is for the probability of observing this correlation coefficient or one more extreme under the null hypothesis ( $H_0$ ) that the correlation ( $Rho$ ) is 0.

**Table S9a:** Pearson's correlation coefficients for serologic factors, age and BMI in 808 women with advanced stage endometrioid adenocarcinoma

|                                   | Age      | BMI      | IGF-I          | IGFBP-3  | Insulin <sup>a</sup> | Estradiol <sup>b</sup> | Estrone <sup>b</sup> | SHBG <sup>b</sup> |
|-----------------------------------|----------|----------|----------------|----------|----------------------|------------------------|----------------------|-------------------|
| Age, y, $\rho$                    | 1.00     |          |                |          |                      |                        |                      |                   |
| Age, y, p-value                   | -        |          |                |          |                      |                        |                      |                   |
| BMI (kg/m <sup>2</sup> ), $\rho$  | -0.15347 | 1.00     |                |          |                      |                        |                      |                   |
| BMI (kg/m <sup>2</sup> ), p-value | <.0001   | -        |                |          |                      |                        |                      |                   |
| IGF-I, $\rho$                     | -0.10147 | -0.12132 | 1.00           |          |                      |                        |                      |                   |
| IGF-I, p-value                    | 0.0039   | 0.0006   | -              |          |                      |                        |                      |                   |
| IGFBP-3, $\rho$                   | 0.04010  | -0.13482 | <b>0.56436</b> | 1.00     |                      |                        |                      |                   |
| IGFBP-3, p-value                  | 0.2549   | 0.0001   | <.0001         | -        |                      |                        |                      |                   |
| Insulin <sup>a</sup> , $\rho$     | -0.10328 | 0.18644  | 0.14824        | 0.02659  | 1.00                 |                        |                      |                   |
| Insulin <sup>a</sup> , p-value    | 0.1980   | 0.0194   | 0.0639         | 0.7409   | -                    |                        |                      |                   |
| Estradiol <sup>b</sup> , $\rho$   | -0.32857 | 0.02522  | 0.11298        | -0.04048 | -0.06361             | 1.00                   |                      |                   |
| Estradiol <sup>b</sup> , p-value  | <.0001   | 0.6227   | 0.0272         | 0.4295   | 0.5929               | -                      |                      |                   |
| Estrone <sup>b</sup> , $\rho$     | -0.12989 | 0.08746  | -0.02623       | -0.12417 | -0.10754             | 0.28788                | 1.00                 |                   |
| Estrone <sup>b</sup> , p-value    | 0.0106   | 0.0862   | 0.6079         | 0.0146   | 0.2384               | <.0001                 | -                    |                   |
| SHBG <sup>b</sup> , $\rho$        | 0.09143  | -0.25571 | -0.05992       | -0.00386 | 0.13621              | 0.02503                | -0.03996             | 1.00              |
| SHBG <sup>b</sup> , P-value       | 0.0706   | <.0001   | 0.2365         | 0.9393   | 0.2439               | 0.6258                 | 0.4343               | -                 |

<sup>a</sup>Restricted to individuals (N=157) who were fasting.

<sup>b</sup>Restricted to individuals (N=393) who were postmenopausal and non-users of hormone therapy, or women who were also fasting women for measurements of insulin (N=75).

$\rho$  is the Pearson's correlation coefficient. Correlation coefficients  $\geq 0.50$  are highlighted.

P-value is for the probability of observing this correlation coefficient or one more extreme under the null hypothesis (H0) that the correlation (Rho) is 0.

**Table S9b:** Pearson's correlation coefficients for serologic factors, age and BMI in 193 women with advanced stage endometrioid adenocarcinoma restricting to cases who were non-diabetic, postmenopausal and non-users of hormone therapy

|                                   | Age      | BMI      | IGF-I          | IGFBP-3  | Insulin <sup>a</sup> | Estradiol <sup>b</sup> | Estrone <sup>b</sup> | SHBG <sup>b</sup> |
|-----------------------------------|----------|----------|----------------|----------|----------------------|------------------------|----------------------|-------------------|
| Age, y, ρ                         | 1.00     |          |                |          |                      |                        |                      |                   |
| Age, y, p-value                   | -        |          |                |          |                      |                        |                      |                   |
| BMI (kg/m <sup>2</sup> ), ρ       | -0.05554 | 1.00     |                |          |                      |                        |                      |                   |
| BMI (kg/m <sup>2</sup> ), p-value | 0.4418   | -        |                |          |                      |                        |                      |                   |
| IGF-I, ρ                          | -0.16160 | -0.11222 | 1.00           |          |                      |                        |                      |                   |
| IGF-I, p-value                    | 0.0251   | 0.1212   | -              |          |                      |                        |                      |                   |
| IGFBP-3, ρ                        | 0.03910  | -0.13684 | <b>0.54351</b> | 1.00     |                      |                        |                      |                   |
| IGFBP-3, p-value                  | 0.5893   | 0.0577   | <.0001         | -        |                      |                        |                      |                   |
| Insulin <sup>a</sup> , ρ          | -0.07395 | 0.18419  | 0.06094        | -0.00612 | 1.00                 |                        |                      |                   |
| Insulin <sup>a</sup> , p-value    | 0.4512   | 0.0587   | 0.5349         | 0.9503   | -                    |                        |                      |                   |
| Estradiol, ρ                      | -0.31215 | 0.20745  | 0.02134        | -0.22937 | -0.02773             | 1.00                   |                      |                   |
| Estradiol, p-value                | <.0001   | 0.0043   | 0.7719         | 0.0015   | 0.7799               | -                      |                      |                   |
| Estrone, ρ                        | -0.17731 | 0.11394  | -0.11061       | -0.19306 | -0.03058             | 0.34678                | 1.00                 |                   |
| Estrone, p-value                  | 0.0141   | 0.1165   | 0.1287         | 0.0075   | 0.7568               | <.0001                 | -                    |                   |
| SHBG, ρ                           | 0.02847  | -0.27519 | -0.07704       | 0.02573  | -0.15543             | 0.06367                | -0.02706             | 1.00              |
| SHBG, P-value                     | 0.6951   | 0.0001   | 0.2882         | 0.7232   | 0.1116               | 0.3867                 | 0.7109               | -                 |

<sup>a</sup>Restricted to individuals (N=106) who were fasting.

ρ is the Pearson's correlation coefficient. Correlation coefficients  $\geq 0.50$  are highlighted.

P-value is for the probability of observing this correlation coefficient or one more extreme under the null hypothesis (H0) that the correlation (Rho) is 0.

**Table S10:** Pearson's correlation coefficients for insulin/IGF and sex hormone axis tumor gene expression in 365 women with advanced stage endometrioid adenocarcinoma

|                         | Gene expression (normalized <i>PPIB</i> ) |             |               |               |
|-------------------------|-------------------------------------------|-------------|---------------|---------------|
|                         | <i>IGF1</i>                               | <i>IGF2</i> | <i>IGFBP1</i> | <i>IGFBP3</i> |
| <i>IGF1</i> , $\rho$    | 1.00                                      |             |               |               |
| <i>IGF1</i> , p-value   | -                                         |             |               |               |
| <i>IGF2</i> , $\rho$    | 0.18405                                   | 1.00        |               |               |
| <i>IGF2</i> , p-value   | 0.0004                                    | -           |               |               |
| <i>IGFBP1</i> , $\rho$  | 0.12112                                   | 0.04037     | 1.00          |               |
| <i>IGFBP1</i> , p-value | 0.0206                                    | 0.4419      | -             |               |
| <i>IGFBP3</i> , $\rho$  | 0.15683                                   | 0.15683     | 0.43548       | 1.00          |
| <i>IGFBP3</i> , p-value | 0.0027                                    | 0.0027      | <.0001        | -             |

$\rho$  is the Pearson's correlation coefficient.

P-value is for the probability of observing this correlation coefficient or one more extreme under the null hypothesis ( $H_0$ ) that the correlation ( $Rho$ ) is 0.

**Table S11a:** Pearson's correlation coefficients for insulin/IGF and sex hormone axis tumor proteins in 524 women with advanced stage endometrioid adenocarcinoma

|                                   | Age      | BMI      | ER (gland)<br>H-score | ER<br>(stroma) H-<br>score | PR (gland)<br>H-score | PR<br>(stroma) H-<br>score | IR-cyto        | IR-nucl        | IR-overall | pIGF1R/pIR<br>-cyto | pIGF1R/pIR<br>-overall |
|-----------------------------------|----------|----------|-----------------------|----------------------------|-----------------------|----------------------------|----------------|----------------|------------|---------------------|------------------------|
| Age, y, $\rho$                    | 1.00     |          |                       |                            |                       |                            |                |                |            |                     |                        |
| Age, y, p-value                   | -        |          |                       |                            |                       |                            |                |                |            |                     |                        |
| BMI (kg/m <sup>2</sup> ), $\rho$  | -0.15347 | 1.00     |                       |                            |                       |                            |                |                |            |                     |                        |
| BMI (kg/m <sup>2</sup> ), p-value | <.0001   | -        |                       |                            |                       |                            |                |                |            |                     |                        |
| ER (gland) H-score, $\rho$        | 0.14520  | 0.02786  | 1.00                  |                            |                       |                            |                |                |            |                     |                        |
| ER (gland) H-score, p-value       | 0.0009   | 0.5253   | -                     |                            |                       |                            |                |                |            |                     |                        |
| ER (stroma) H-score, $\rho$       | 0.06232  | 0.01642  | 0.28941               | 1.00                       |                       |                            |                |                |            |                     |                        |
| ER (stroma) H-score, p-value      | 0.1550   | 0.7082   | <.0001                | -                          |                       |                            |                |                |            |                     |                        |
| PR (gland) H-score, $\rho$        | -0.00269 | 0.23243  | <b>0.51715</b>        | 0.11116                    | 1.00                  |                            |                |                |            |                     |                        |
| PR (gland) H-score, p-value       | 0.9510   | <.0001   | <.0001                | 0.0112                     | -                     |                            |                |                |            |                     |                        |
| PR (stroma) H-score, $\rho$       | -0.02196 | 0.13421  | 0.22554               | <b>0.71590</b>             | 0.20479               | 1.00                       |                |                |            |                     |                        |
| PR (stroma) H-score, p-value      | 0.6160   | 0.0021   | <.0001                | <.0001                     | <.0001                | -                          |                |                |            |                     |                        |
| IR-cyto, $\rho$                   | -0.07394 | -0.05449 | 0.06615               | 0.08142                    | 0.01686               | 0.09515                    | 1.00           |                |            |                     |                        |
| IR-cyto, p-value                  | 0.0931   | 0.2161   | 0.1342                | 0.0651                     | 0.7025                | 0.0307                     | -              |                |            |                     |                        |
| IR-nucl, $\rho$                   | 0.00409  | -0.03110 | 0.24805               | 0.12405                    | 0.12860               | 0.10177                    | 0.25881        | 1.00           |            |                     |                        |
| IR-nucl, p-value                  | 0.9261   | 0.4804   | <.0001                | 0.0049                     | 0.0034                | 0.0208                     | <.0001         | -              |            |                     |                        |
| IR-overall, $\rho$                | -0.03867 | -0.02119 | 0.16037               | 0.15300                    | 0.05433               | 0.11993                    | <b>0.61375</b> | <b>0.55293</b> | 1.00       |                     |                        |
| IR-overall, p-value               | 0.3803   | 0.6307   | 0.0003                | 0.0005                     | 0.2179                | 0.0064                     | <.0001         | <.0001         | -          |                     |                        |
| pIGF1R/pIR-cyto, $\rho$           | 0.06414  | -0.03066 | 0.13584               | 0.04439                    | -0.00863              | -0.01810                   | 0.09084        | 0.12897        | 0.12550    | 1.00                |                        |
| pIGF1R/pIR-cyto, p-value          | 0.1571   | 0.4992   | 0.0027                | 0.3288                     | 0.8495                | 0.6907                     | 0.0460         | 0.0045         | 0.0057     | -                   |                        |
| pIGF1R/pIR-overall, $\rho$        | 0.04603  | -0.03576 | 0.15398               | 0.06193                    | 0.15398               | -0.02822                   | 0.06558        | 0.15986        | 0.11751    | <b>0.87770</b>      | 1.00                   |
| pIGF1R/pIR-overall, p-value       | 0.3102   | 0.4306   | 0.0007                | 0.1729                     | 0.0007                | 0.5348                     | 0.1501         | 0.0004         | 0.0097     | <.0001              | -                      |

**Table S11a continued:** Pearson's correlation coefficients for insulin/IGF and sex hormone axis tumor proteins in 524 women with advanced stage endometrioid adenocarcinoma

|                          | Age      | BMI      | ER (gland)<br>H-score | ER<br>(stroma) H-<br>score | PR (gland)<br>H-score | PR<br>(stroma) H-<br>score | IR-cyto | IR-nucl | IR-overall | pIGF1R/pIR<br>-cyto | pIGF1R/pIR<br>-overall |
|--------------------------|----------|----------|-----------------------|----------------------------|-----------------------|----------------------------|---------|---------|------------|---------------------|------------------------|
| pIGF1R/pIR-memb, $\rho$  | 0.07752  | -0.05500 | 0.22759               | 0.11355                    | 0.02637               | 0.00330                    | 0.10171 | 0.21842 | 0.14794    | <b>0.69295</b>      | <b>0.82386</b>         |
| pIGF1R/pIR-memb, p-value | 0.0871   | 0.2252   | <.0001                | 0.0122                     | 0.5620                | 0.9421                     | 0.0254  | <.0001  | 0.0011     | <.0001              | <.0001                 |
| IGF1R-cyto, $\rho$       | -0.09024 | 0.04625  | 0.14095               | 0.08873                    | 0.14014               | 0.06504                    | 0.09308 | 0.12062 | 0.17205    | 0.09228             | 0.07377                |
| IGF1R-cyto, p-value      | 0.0446   | 0.3040   | 0.0017                | 0.0485                     | 0.0018                | 0.1480                     | 0.0394  | 0.0075  | 0.0001     | 0.0477              | 0.1137                 |
| IGF1R-overall, $\rho$    | 0.3040   | 0.10478  | 0.10192               | 0.05859                    | 0.18274               | 0.05034                    | 0.22649 | 0.15398 | 0.26308    | 0.04715             | 0.04425                |
| IGF1R-overall, p-value   | 0.0013   | 0.0198   | 0.0236                | 0.1940                     | <.0001                | 0.2641                     | <.0001  | 0.0006  | <.0001     | 0.3134              | 0.3442                 |
| IGF1R-memb, $\rho$       | -0.08466 | 0.09201  | 0.07765               | 0.08396                    | 0.14284               | 0.03650                    | 0.03650 | 0.05870 | 0.14582    | 0.07861             | 0.10447                |
| IGF1R-memb, p-value      | 0.0595   | 0.0405   | 0.0844                | 0.0619                     | 0.0014                | 0.4172                     | 0.4172  | 0.1946  | 0.0012     | 0.0918              | 0.0249                 |

**Table S11b:** Pearson's correlation coefficients for insulin/IGF and sex hormone axis proteins in 524 women with advanced stage endometrioid adenocarcinoma

|                          | pIGF1R/pIR-memb | IGF1R-cyto     | IGF1R-overall  | IGF1R-memb |
|--------------------------|-----------------|----------------|----------------|------------|
| pIGF1R/pIR-memb, $\rho$  | 1.00            |                |                |            |
| pIGF1R/pIR-memb, p-value | -               |                |                |            |
| IGF1R-cyto, $\rho$       | 0.09398         | 1.00           |                |            |
| IGF1R-cyto, p-value      | 0.0437          | -              |                |            |
| IGF1R-overall, $\rho$    | 0.05877         | <b>0.81777</b> | 1.00           |            |
| IGF1R-overall, p-value   | 0.2088          | <.0001         | -              |            |
| IGF1R-memb, $\rho$       | 0.13073         | <b>0.50191</b> | <b>0.68728</b> | 1.00       |
| IGF1R-memb, p-value      | 0.0049          | <.0001         | <.0001         | -          |

$\rho$  is the Pearson's correlation coefficient. Correlation coefficients  $\geq 0.50$  are highlighted.

P-value is for the probability of observing this correlation coefficient or one more extreme under the null hypothesis ( $H_0$ ) that the correlation ( $Rho$ ) is 0.
